RESEARCH ARTICLE

# Determinants of non-utilization of health facilities for childbirth in Papua New Guinea: Evidence from the demographic and health survey

McKenzie Maviso<sup>1,2\*</sup>, Gracelyn Potjepat<sup>3</sup>, Rebecca Bogarobu Emori<sup>2,4,5</sup>, Paula Zebedee Aines<sup>3</sup>, Carolyn Ruth Hastie<sup>6</sup>

**1** Division of Public Health, School of Medicine and Health Sciences, University of Papua New Guinea, Port Moresby, National Capital District, Papua New Guinea, **2** School of Social Sciences, Faculty of Arts, Social Sciences and Humanities, University of Wollongong, Northfields Ave, Wollongong, New South Wales Australia, **3** Division of Nursing, School of Medicine and Health Sciences, University of Papua New Guinea, Port Moresby, Papua New Guinea, **4** Early Start Research Institute, University of Wollongong, Northfields Ave, Wollongong, New South Wales Australia, **5** Population Health Unit, Papua New Guinea Institute of Medical Research, Goroka, Eastern Highlands Province, Papua New Guinea, **6** School of Nursing and Midwifery, Griffith University, Logan Campus, University Drive, Meadowbrook, Qld, Australia

\* [mckenzie.maviso@upng.ac.pg](mailto:mckenzie.maviso@upng.ac.pg)

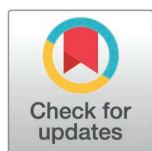

## OPEN ACCESS

**Citation:** Maviso M, Potjepat G, Emori RB, Aines PZ, Hastie CR (2025) Determinants of non-utilization of health facilities for childbirth in Papua New Guinea: Evidence from the demographic and health survey. PLoS One 20(12): e0338606. <https://doi.org/10.1371/journal.pone.0338606>

**Editor:** Oyelola A. Adegboye, Menzies School of Health Research: Charles Darwin University, AUSTRALIA

**Received:** May 26, 2025

**Accepted:** November 25, 2025

**Published:** December 30, 2025

**Copyright:** © 2025 Maviso et al. This is an open access article distributed under the terms of the [Creative Commons Attribution License](https://creativecommons.org/licenses/by/4.0/), which permits unrestricted use, distribution, and reproduction in any medium, provided the original author and source are credited.

**Data availability statement:** The 2016–2018 PNG DHS dataset was obtained from the DHS Program that is available at <https://dhsprogram.com/methodology/survey/survey-display-499.cfm>. It is ethically not acceptable to share the

## Abstract

### Background

Health facility-based childbirth services are essential for reducing maternal and neonatal mortality. Yet, these services remain underutilized in many low- and middle-income countries (LMICs), including Papua New Guinea (PNG), where birthing at home or in village settings continue to predominate. This study investigated the determinants of non-utilization of health facilities for childbirth among women in PNG.

### Methods

Data from a weighted sample of 6,432 women using the 2016–2018 PNG Demographic and Health Survey (DHS) were analyzed. Descriptive statistics and multivariate logistic regression analyses were conducted to determine the factors associated with the non-utilization of health facilities for childbirth. The adjusted odds ratios (AOR) with their corresponding 95% confidence intervals (CI) were computed using the Statistical Package for Social Sciences, version 30.0.

### Results

Overall, 58.3% (95% CI: 57.0–59.5) of women did not give birth in a health facility. Women were more likely to give birth at home or in the village if they had no formal education (AOR: 1.48; 95% CI: 1.11–2.09), lived in rural areas (AOR: 1.31; 95% CI: 1.11–1.75), were from the Southern (AOR: 1.05; 95% CI: 1.01–1.54), or Momase (AOR: 1.06; 95% CI: 1.02–1.83) regions, made their own healthcare decisions

DHS dataset with third parties and authors who want the dataset can access through the Measure DHS Program upon reasonable request.

**Funding:** The author(s) received no specific funding for this work.

**Competing interests:** The authors have declared that no competing interests exist.

(AOR: 1.21; 95% CI: 1.10–4.14), had these decisions made by their husbands (AOR: 1.69; 95% CI: 1.13–2.63), walked to a health facility (AOR: 1.01; 95% CI: 1.00–1.67), or traveled more than 24 hours to access care (AOR: 1.02; 95% CI: 1.39–2.70), and had no antenatal care visits during pregnancy (AOR: 1.08; 95% CI: 1.04–1.51).

## Conclusions

Over half of the women in this study did not utilize health facilities for childbirth. Demographic and health service-related factors influenced the non-utilization of facility-based childbirth, highlighting the need to scale up maternal health services. Increasing uptake of facility-based childbirth requires coordinated system-level efforts and incentive-based interventions that promote antenatal care and skilled birth attendance, especially for rural women. Male-inclusive strategies in maternal health decision-making are critical for improving women's access to and utilization of facility-based childbirth services.

## Introduction

Maternal mortality remains a significant global health challenge, disproportionately concentrated in many low- and middle-income countries (LMICs), where systemic health inequities are more deeply entrenched [1]. Globally, approximately 800 women die each day from complications related to pregnancy and childbirth, reflecting a maternal mortality ratio (MMR) of 223 deaths per 100,000 live births [2]. Despite substantial global initiatives to strengthen maternal healthcare, progress remains limited and uneven, with preventable maternal deaths still considerably high, particularly among socioeconomically marginalized women [3]. In 2023, approximately 260,000 women died from preventable causes associated with pregnancy and childbirth, almost 92% of whom died in LMICs [4]. The leading cause of maternal death globally is hemorrhage (27%), followed by indirect obstetric causes (23%), hypertensive disorders (16%), and puerperal sepsis (15%) [4–6]. Enhancing access to high-quality, affordable maternal health services is essential for reducing preventable maternal deaths.

The presence of skilled birth attendants is consistently recognized as a critical determinant in the reduction of maternal and neonatal mortality [7,8]. According to the World Health Organization (WHO), a skilled birth attendant is a certified health professional, such as a midwife, doctor, or nurse, with the necessary education and training to provide effective care and support to women during normal childbirth and the immediate postnatal period, as well as to identify and attend to obstetric complications [9,10]. Supervised births in health facilities by skilled birth attendants align with the United Nations Sustainable Development Goal 3 to reduce maternal and neonatal mortality and improve the survival rates of mothers and newborns by 2030 [11,12]. Recent global estimates from Joint UNICEF-WHO data indicate that the number of skilled birth attendants has improved from 61% in 2000 to 86% in 2023 [13]. Evidence indicates that timely access to skilled care and emergency obstetric services could prevent up to 75% of maternal deaths globally [4].

Despite global improvements in skilled birth attendant coverage, many women continue to give birth without their support, even where such services are accessible [7,13]. A comparative study found that a significant proportion of women in Nigeria (54.9%) and Ethiopia (45.4%) preferred home or village births due to the perception that facility-based childbirth was unnecessary [14]. A population-based survey found that nearly half (47.6%) of Guinean women did not give birth at health facilities [15]. Women's choice of birthplace is shaped by a complex set of factors, including maternal characteristics (e.g., age, parity, education, and marital status), household attributes (e.g., family size, wealth, and socioeconomic status), geographic barriers (e.g., rural residence and long distances to health facilities), sociocultural norms and beliefs (e.g., traditional birthing practices and gender roles), and health service-related factors (e.g., poorly maintained infrastructure, negative staff attitudes, and limited trust in formal care) [15–18].

Papua New Guinea (PNG) has one of the world's most geographically dispersed and isolated populations, creating significant health challenges driven by limited accessibility, systemic inequities, and a fragmented healthcare system [19,20]. The country also has one of the highest maternal mortality rates in the Western Pacific region, estimated at 189 per 100,000 live births [21]. In the absence of reliable, consistent country-specific data, international organizations, such as the United Nations Maternal Mortality Estimation Inter-Agency Group (MMEIG) produce estimates to address these gaps [21]. However, the accuracy of these estimates remains contested, as evidenced by national data sources (e.g., Demographic and Health Surveys and Health Information Systems) and local research, which often report significantly higher maternal mortality figures than those produced by internationally applied statistical models [22]. Despite the challenges in measurement, the MMR in PNG remains unacceptably high. Most maternal deaths in the country are attributed to obstetric hemorrhage, sepsis, embolism, eclampsia, and unsafe abortion, conditions that are mostly preventable through appropriate and timely maternal healthcare [23–25]. Sociodemographic factors, along with the absence of skilled or supervised care during antenatal visits, childbirth, and the early postpartum period, are key contributors to these preventable deaths [24,25]. Ensuring equitable, high-quality access to antenatal care and skilled birth attendance is essential for improving maternal and neonatal health outcomes.

Over the past decade, the PNG government and its development partners have made substantial investments to improve maternal health through collaborative initiatives. However, implementation has remained disproportionate and hindered by persistent challenges [19,26]. In 2023, only about 45% of births occurred in health facilities in PNG [27], indicating critically low access to and utilization of maternal healthcare services, including supervised births by skilled birth attendants [18,28]. A recent study revealed that just over half of women in PNG accessed antenatal care (52.3%) and received support from skilled birth attendants (58.7%), while postnatal care use remained low, with only 26.6% of women accessing these services [28]. While women who access antenatal care and give birth in health facilities often acknowledge the benefits of these services, their decisions to seek maternal healthcare are influenced by a complex interplay of factors [29]. A maternal and infant health survey across three provinces in PNG found that 44% of home or village births occurred among multiparous women with limited formal education [30]. Contributing factors to the avoidance of facility-based childbirth include sociocultural beliefs, inadequate health infrastructure, negative staff attitudes, and apprehension with male birth attendants [30–32]. Significant disparities in maternal health pose a major challenge to public health policy and service delivery, underscoring the need for urgent, targeted interventions. This study investigated the prevalence and determinants of non-utilization of health facilities for childbirth among women in PNG, drawing on nationally representative survey data.

## Materials and methods

### Data source and sampling

Data were drawn from the 2016–2018 PNGDHS, a population-based cross-sectional survey. The DHS collects national data on maternal and child health, such as fertility, contraceptive use, parity, breastfeeding and infant feeding practices, children's nutritional status, immunization, women's empowerment, intimate partner violence, awareness and behavior

regarding HIV/AIDS and other sexually transmitted infections (STIs), and other health-related factors [33]. The survey used the list of census units (CU) from the 2011 National Population and Housing Census as the sampling frame [34].

The PNGDHS uses a two-stage stratified sampling technique. In the first stage, 800 CU were selected, which was achieved through a probability proportional to the CU size [33]. The second sampling stage involved selecting 24 households from each cluster via equal probability systematic selection, resulting in a sample of approximately 19,200 households. In the survey, 18,175 women of reproductive age were identified, and 15,198 completed their interviews, resulting in an 84% response rate. This study included a weighted sample of 6,432 women aged 15–49 years who had complete information on the variables of interest and had given birth in the three years preceding the survey. Details of the methodology, pretesting, training of field workers, sampling design, and selection are available in the final DHS report [33]. The dataset is publicly accessible online via this link: <https://dhsprogram.com/methodology/survey/survey-display-499.cfm>.

### Study variables and measurements

The dependent variable for this study was the place of birth. During data collection, respondents were asked, “Where did you give birth to (NAME)?” The responses included home or village (i.e., respondents’ home or in the village), public sector (i.e., government hospital, health center, or community health post), and private sector (i.e., church hospital or health center, community health post, or private hospital/clinic or other private health facilities). A new variable for place of birth was created and coded as ‘0’ to indicate childbirth at home or in a village, and ‘1’ to indicate childbirth in a health facility.

The explanatory variables included in this study were selected based on their availability in the dataset and previous studies associated with the use of skilled birth attendants or supervised births in health facilities [15,18,35,36]. These variables comprised age, marital status, respondent’s educational level, husband’s educational level, respondent’s employment status, husband’s employment status, wealth index, administrative region, place of residence, sex of the household head, decision-making for healthcare services, health insurance coverage, mode of transport to reach a health facility, distance to reach a health facility, number of antenatal care visits, and the number of children alive (Table 1).

### Statistical analysis

All statistical analyses were computed using the Statistical Package for the Social Sciences (SPSS) for Windows, version 30.0 (Armonk, NY: IBM Corp., 2023). Descriptive statistics were conducted to obtain valid weighted frequencies and percentages. Pearson’s chi-square test of independence was used to examine the association between the outcome variable and the explanatory variables. Those variables that were statistically significant at an alpha level of 0.05 were included in the multivariate logistic regression analysis. A test for multicollinearity was conducted via the variance inflation factor (VIF) to assess the correlations among the independent variables [37]. The results revealed no multicollinearity (the VIF ranged from 1.03 to 1.32, with a mean of 1.31). The relationship between the explanatory variables and the place of birth was assessed using adjusted odds ratios (AOR) with their 95% confidence intervals (CI). Sample weight (women’s sample weight by 1,000,000) was applied to account for the unequal sampling of women from the enumeration areas, and the complex samples plan (‘cplan’) for logistic regression in SPSS was used in the analysis to account for the survey’s complex nature. The primary sampling units, sample strata, and sample weights were adjusted in the univariate, bivariate, and multivariate analyses. This enhanced the accuracy of the CI and standard errors in the multivariate logistic regression model. Statistical significance was set at  $p < 0.05$ . This study adhered to the guidelines outlined in the Strengthening the Reporting of Observational Studies in Epidemiology (STROBE) statement [38].

### Ethics consideration

Ethics approval was not required for this study, as it used publicly available secondary data obtained from the DHS Program website (<https://dhsprogram.com/>). Informed consent was obtained from each participant before the survey, and the

**Table 1. Demographic characteristics of the participants, PNGDHS 2016–2018.**

| Variables                                                        | N=6,432 | %    |
|------------------------------------------------------------------|---------|------|
| <b>Age (years)</b>                                               |         |      |
| 15–24                                                            | 1,625   | 25.3 |
| 25–34                                                            | 3,063   | 47.6 |
| 35–44                                                            | 1,568   | 24.4 |
| 45 or more                                                       | 176     | 2.7  |
| <b>Marital status</b>                                            |         |      |
| Married                                                          | 6,227   | 96.8 |
| Cohabiting                                                       | 206     | 3.2  |
| <b>Respondent's educational level</b>                            |         |      |
| No formal education                                              | 1,567   | 24.4 |
| Primary                                                          | 3,203   | 49.8 |
| Secondary                                                        | 1,389   | 21.6 |
| Higher                                                           | 273     | 4.3  |
| <b>Husband's education level (missing, n = 790)</b>              |         |      |
| No formal education                                              | 1,119   | 19.8 |
| Primary                                                          | 2,422   | 42.9 |
| Secondary                                                        | 1,627   | 28.8 |
| Higher                                                           | 474     | 8.4  |
| <b>Respondent's employment status</b>                            |         |      |
| Not working                                                      | 4,420   | 68.7 |
| Working                                                          | 2,012   | 31.3 |
| <b>Husband's employment status (missing, n = 931)</b>            |         |      |
| Not working                                                      | 2,738   | 49.8 |
| Working                                                          | 2,763   | 50.2 |
| <b>Wealth index</b>                                              |         |      |
| Poorer                                                           | 1,301   | 20.2 |
| Poor                                                             | 1,268   | 19.7 |
| Middle                                                           | 1,282   | 19.9 |
| Rich                                                             | 1,321   | 20.5 |
| Richer                                                           | 1,260   | 19.6 |
| <b>Region</b>                                                    |         |      |
| Southern                                                         | 1,273   | 19.8 |
| Highlands                                                        | 2,457   | 38.2 |
| Momase                                                           | 1,773   | 27.6 |
| Islands                                                          | 929     | 14.4 |
| <b>Place of residence</b>                                        |         |      |
| Urban                                                            | 748     | 11.6 |
| Rural                                                            | 5,684   | 88.4 |
| <b>Sex of the household head</b>                                 |         |      |
| Male                                                             | 5,426   | 84.3 |
| Female                                                           | 1,007   | 15.7 |
| <b>Decision-making for healthcare service (missing, n = 695)</b> |         |      |
| Respondent alone                                                 | 1,671   | 29.1 |
| Joint decision                                                   | 3,193   | 55.6 |
| Husband/partner                                                  | 769     | 13.4 |
| Someone else                                                     | 104     | 1.8  |

(Continued)

**Table 1.** (Continued)

| Variables                                                                        | N=6,432 | %    |
|----------------------------------------------------------------------------------|---------|------|
| <b>Covered by health insurance</b>                                               |         |      |
| No                                                                               | 6,245   | 97.1 |
| Yes                                                                              | 187     | 2.9  |
| <b>Mode of transport to the health facility (missing, n=4,078)</b>               |         |      |
| On foot                                                                          | 1,293   | 54.9 |
| Vehicle                                                                          | 926     | 39.4 |
| Boat/canoe                                                                       | 134     | 5.7  |
| <b>Travel distance to the nearest health facility (hours) (missing, n=4,068)</b> |         |      |
| 0–5                                                                              | 1,333   | 56.4 |
| 6–23                                                                             | 958     | 40.5 |
| 24 or more                                                                       | 73      | 3.1  |
| <b>Number of antenatal care visits (missing, n=313)</b>                          |         |      |
| None                                                                             | 1,367   | 22.3 |
| 1–3                                                                              | 1,517   | 24.8 |
| 4 or more                                                                        | 3,235   | 52.9 |
| <b>Number of children living</b>                                                 |         |      |
| 1                                                                                | 1,565   | 24.3 |
| 2                                                                                | 1,325   | 20.6 |
| 3 or more                                                                        | 3,542   | 55.1 |

**Note:** Weighted frequencies (N) and percentage (%).

<https://doi.org/10.1371/journal.pone.0338606.t001>

anonymity and confidentiality of the participants were ensured. All the methods were conducted in accordance with the relevant guidelines and regulations.

## Results

### Characteristics of the study participants

**Table 1** presents the sociodemographic characteristics of the study participants. Among the total 6,432 women (weighted sample), the mean age was 29.89 years (SD = 7.01), with nearly half aged between 25 and 34 years (47.6%) and had a primary education level (49.8%). More than two-thirds of the participants were not working (68.7%) and lived in rural areas (88.4%). Similarly, over half of the respondents and their husbands made joint decisions regarding healthcare services (55.6%), had to travel for approximately five hours to reach the health facility (56.4%), and had four or more antenatal care visits (52.9%).

### Bivariate analysis of place of birth for women in PNG

**Table 2** presents the bivariate analysis of factors associated with the place of birth in PNG. Overall, 3,809 women (58.3% [95% CI: 57.0–59.5]) reported giving birth either at home or in the village. Among these respondents, more than half were aged 15–24 years (66.3%), married (59%), had a primary education level (57.2%), were unemployed (56%), and lived in rural areas (55.4%). Nearly two-thirds (63%) made their own decisions regarding healthcare services. Three-quarters reported walking for about five hours to reach a health facility (76.6%) and having four or more antenatal care visits (76.5%). Chi-square analysis results indicated a statistically significant association between all explanatory variables, except marital status, and the non-utilization of health facilities for childbirth among women in PNG ( $p < 0.05$ ).



**Table 2. Bivariate analysis of place of birth for women in PNG, PNGDHS 2016–2018.**

| Variables                                                        | Facility-based birth | %           | Home or village birth | %           | p-value* |
|------------------------------------------------------------------|----------------------|-------------|-----------------------|-------------|----------|
| <b>Sample (N)</b>                                                | <b>2,623</b>         | <b>41.7</b> | <b>3,809</b>          | <b>58.3</b> |          |
| <b>Age (years)</b>                                               |                      |             |                       |             | < 0.001  |
| 15–24                                                            | 548                  | 33.7        | 1,077                 | 66.3        |          |
| 25–34                                                            | 1,268                | 41.4        | 1,795                 | 58.6        |          |
| 35–44                                                            | 703                  | 44.8        | 865                   | 55.2        |          |
| 45 or more                                                       | 105                  | 59.3        | 72                    | 40.7        |          |
| <b>Marital status</b>                                            |                      |             |                       |             | 0.061    |
| Married                                                          | 2,552                | 41.0        | 674                   | 59.0        |          |
| Cohabiting                                                       | 71                   | 34.5        | 135                   | 65.6        |          |
| <b>Respondent's educational level</b>                            |                      |             |                       |             | < 0.001  |
| No formal education                                              | 1,017                | 64.9        | 550                   | 35.1        |          |
| Primary                                                          | 1,371                | 42.8        | 1,832                 | 57.2        |          |
| Secondary                                                        | 228                  | 16.4        | 1,161                 | 83.6        |          |
| Higher                                                           | 7                    | 2.6         | 267                   | 97.4        |          |
| <b>Husband's educational level (missing, n = 790)</b>            |                      |             |                       |             | < 0.001  |
| No formal education                                              | 717                  | 64.1        | 402                   | 35.9        |          |
| Primary                                                          | 1,196                | 49.4        | 1,225                 | 50.6        |          |
| Secondary                                                        | 376                  | 32.1        | 1,251                 | 76.9        |          |
| Higher                                                           | 60                   | 12.7        | 414                   | 87.3        |          |
| <b>Respondent's employment status</b>                            |                      |             |                       |             | < 0.001  |
| Not working                                                      | 1,943                | 44.0        | 2,477                 | 56.0        |          |
| Working                                                          | 680                  | 33.8        | 1,332                 | 66.2        |          |
| <b>Husband's employment status (missing, n = 931)</b>            |                      |             |                       |             | < 0.001  |
| Not working                                                      | 1,343                | 49.1        | 1,395                 | 50.9        |          |
| Working                                                          | 942                  | 34.1        | 1,821                 | 65.9        |          |
| <b>Wealth index</b>                                              |                      |             |                       |             | < 0.001  |
| Poorer                                                           | 850                  | 65.3        | 451                   | 34.7        |          |
| Poor                                                             | 751                  | 59.2        | 517                   | 40.8        |          |
| Middle                                                           | 556                  | 43.4        | 726                   | 56.6        |          |
| Rich                                                             | 374                  | 28.3        | 947                   | 71.7        |          |
| Richer                                                           | 91                   | 7.2         | 1,169                 | 92.8        |          |
| <b>Region</b>                                                    |                      |             |                       |             | < 0.001  |
| Southern                                                         | 399                  | 31.4        | 873                   | 68.6        |          |
| Highlands                                                        | 1,013                | 41.2        | 1,444                 | 58.8        |          |
| Momase                                                           | 980                  | 55.2        | 794                   | 44.8        |          |
| Islands                                                          | 232                  | 24.9        | 698                   | 75.1        |          |
| <b>Place of residence</b>                                        |                      |             |                       |             | < 0.001  |
| Urban                                                            | 90                   | 12.0        | 658                   | 88.0        |          |
| Rural                                                            | 2,533                | 44.6        | 3,151                 | 55.4        |          |
| <b>Sex of the household head</b>                                 |                      |             |                       |             | < 0.001  |
| Male                                                             | 2,320                | 42.8        | 3,106                 | 57.2        |          |
| Female                                                           | 303                  | 30.1        | 704                   | 69.9        |          |
| <b>Decision-making for healthcare service (missing, n = 695)</b> |                      |             |                       |             | < 0.001  |
| Respondent alone                                                 | 619                  | 37.0        | 1,052                 | 63.0        |          |
| Joint decision                                                   | 1,309                | 41.0        | 1,884                 | 59.0        |          |

(Continued)

**Table 2.** (Continued)

| Variables                                                                        | Facility-based birth | %    | Home or village birth | %    | p-value* |
|----------------------------------------------------------------------------------|----------------------|------|-----------------------|------|----------|
| Husband/partner                                                                  | 389                  | 50.6 | 380                   | 49.4 |          |
| Someone else                                                                     | 57                   | 54.8 | 47                    | 45.2 |          |
| <b>Covered by health insurance</b>                                               |                      |      |                       |      | < 0.001  |
| No                                                                               | 2,609                | 41.8 | 3,636                 | 58.2 |          |
| Yes                                                                              | 14                   | 7.5  | 173                   | 92.5 |          |
| <b>Mode of transport to the health facility (missing, n=4,078)</b>               |                      |      |                       |      | < 0.001  |
| On foot                                                                          | 519                  | 40.1 | 774                   | 59.9 |          |
| Vehicle                                                                          | 221                  | 23.8 | 706                   | 76.2 |          |
| Boat/canoe                                                                       | 46                   | 34.3 | 88                    | 65.7 |          |
| <b>Travel distance to the nearest health facility (hours) (missing, n=4,068)</b> |                      |      |                       |      | < 0.001  |
| 0–5                                                                              | 312                  | 23.4 | 1,021                 | 76.6 |          |
| 6–23                                                                             | 429                  | 44.7 | 530                   | 55.3 |          |
| 24 or more                                                                       | 43                   | 58.9 | 30                    | 41.1 |          |
| <b>Number of antenatal care visits (missing, n=313)</b>                          |                      |      |                       |      | < 0.001  |
| None                                                                             | 1,183                | 86.5 | 184                   | 13.5 |          |
| 1–3                                                                              | 576                  | 38.0 | 941                   | 62.0 |          |
| 4 or more                                                                        | 759                  | 23.5 | 2,477                 | 76.5 |          |
| <b>Number of children living</b>                                                 |                      |      |                       |      | < 0.001  |
| 1                                                                                | 430                  | 27.5 | 1,135                 | 72.5 |          |
| 2                                                                                | 466                  | 35.2 | 859                   | 64.8 |          |
| 3 or more                                                                        | 1,727                | 48.8 | 1,815                 | 51.2 |          |

\*Chi-square test;  $p \leq 0.05$ .

<https://doi.org/10.1371/journal.pone.0338606.t002>

## Determinants of the non-utilization of health facilities for childbirth

**Table 3** presents the determinants of the non-utilization of health facilities for childbirth among women in PNG. Multivariate analysis showed that women were more likely to give birth at home or in the village if they had no formal education (AOR: 1.48; 95% CI: 1.11–2.09), lived in rural areas (AOR: 1.31; 95% CI: 1.11–1.75), were from the Southern (AOR: 1.05; 95% CI: 1.01–1.54), or Momase (AOR: 1.06; 95% CI: 1.02–1.83) regions, made their own healthcare decisions (AOR: 1.21; 95% CI: 1.10–4.14), had these decisions made by their husbands (AOR: 1.69; 95% CI: 1.13–2.63), walked to a health facility (AOR: 1.01; 95% CI: 1.00–1.67), or traveled more than 24 hours to access care (AOR: 1.02; 95% CI: 1.39–2.70), and had no antenatal care visits during pregnancy (AOR: 1.08; 95% CI: 1.04–1.51). Conversely, women were less likely to give birth at home or in the village if they were from the Highlands region (AOR: 0.34; 95% CI: 0.19–0.59), had primary (AOR: 0.69; 95% CI: 0.30–0.87), or secondary education (AOR: 0.11; 95% CI: 0.03–0.43), made joint health-care decisions (AOR: 0.83; 95% CI: 0.24–0.96), traveled by vehicle (AOR: 0.25; 95% CI: 0.10–0.58), reached a health facility within 24 hours (AOR: 0.72; 95% CI: 0.49–0.93), and attended at least three antenatal care visits (AOR: 0.49; 95% CI: 0.34–0.69).

## Discussion

Drawing on a nationally representative sample, this study examined the determinants of non-utilization of health facilities for childbirth in PNG. Findings revealed that more than half (58.3%) of the women did not give birth in a health facility. The prevalence of home or village births in PNG is relatively high compared with previous findings in Guinea



**Table 3. Determinants of non-utilization of health facilities for childbirth among women in PNG, PNGDHS 2016–2018.**

| Variables                                     | Crude OR | 95% CI    | Adjusted OR | 95% CI    | p-value* |
|-----------------------------------------------|----------|-----------|-------------|-----------|----------|
| <b>Age (years)</b>                            |          |           |             |           | 0.256    |
| 15–24                                         | Ref.     |           | Ref.        |           |          |
| 25–34                                         | 0.72     | 0.59–0.88 | 1.56        | 0.60–4.07 |          |
| 35–44                                         | 0.63     | 0.51–0.77 | 1.14        | 0.47–2.77 |          |
| 45 or more                                    | 0.35     | 0.22–0.56 | 1.54        | 0.64–3.73 |          |
| <b>Respondent's educational level</b>         |          |           |             |           | < 0.001  |
| No formal education                           | 0.81     | 0.5–1.14  | 1.48        | 1.11–2.09 |          |
| Primary                                       | 0.15     | 0.09–0.25 | 0.69        | 0.17–0.95 |          |
| Secondary                                     | 0.48     | 0.29–0.78 | 0.11        | 0.03–0.43 |          |
| Higher                                        | Ref.     |           | Ref.        |           |          |
| <b>Husband's educational level</b>            |          |           |             |           | 0.051    |
| No formal education                           | 0.08     | 0.05–0.14 | 0.46        | 0.19–0.63 |          |
| Primary                                       | 0.15     | 0.09–0.25 | 0.69        | 0.30–0.87 |          |
| Secondary                                     | 0.48     | 0.29–0.78 | 0.95        | 0.43–1.00 |          |
| Higher                                        | Ref.     |           | Ref.        |           |          |
| <b>Respondent currently working</b>           |          |           |             |           | 0.379    |
| Not working                                   | 0.65     | 0.51–0.83 | 0.84        | 0.57–0.94 |          |
| Working                                       | Ref.     |           | Ref.        |           |          |
| <b>Husband's employment status</b>            |          |           |             |           | 0.851    |
| Not working                                   | 0.54     | 0.44–0.65 | 1.03        | 0.73–1.47 |          |
| Working                                       | Ref.     |           | Ref.        |           |          |
| <b>Wealth index</b>                           |          |           |             |           | 0.080    |
| Poorer                                        | 0.04     | 0.03–0.06 | 0.26        | 0.12–0.59 |          |
| Poor                                          | 0.05     | 0.04–0.08 | 0.22        | 0.09–0.53 |          |
| Middle                                        | 0.10     | 0.07–0.15 | 0.33        | 0.15–0.76 |          |
| Rich                                          | 0.19     | 0.13–0.29 | 0.38        | 0.17–0.87 |          |
| Richer                                        | Ref.     |           | Ref.        |           |          |
| <b>Region</b>                                 |          |           |             |           | < 0.001  |
| Southern                                      | 0.73     | 0.50–1.05 | 1.05        | 1.01–1.54 |          |
| Highlands                                     | 0.47     | 0.33–0.68 | 0.34        | 0.19–0.59 |          |
| Momase                                        | 0.27     | 0.17–0.42 | 1.06        | 1.02–1.83 |          |
| Islands                                       | Ref.     |           | Ref.        |           |          |
| <b>Place of residence</b>                     |          |           |             |           | 0.010    |
| Urban                                         | Ref.     |           | Ref.        |           |          |
| Rural                                         | 0.71     | 0.50–1.05 | 1.31        | 1.11–1.75 |          |
| <b>Sex of the household head</b>              |          |           |             |           | 0.499    |
| Male                                          | 0.58     | 0.45–0.74 | 0.82        | 0.46–0.97 |          |
| Female                                        | Ref.     |           | Ref.        |           |          |
| <b>Decision-making for healthcare service</b> |          |           |             |           | 0.024    |
| Respondent alone                              | 2.04     | 0.61–6.83 | 1.21        | 1.10–4.14 |          |
| Joint decision                                | 1.72     | 0.52–5.69 | 0.83        | 0.24–0.96 |          |
| Husband/partner                               | 1.17     | 0.34–4.01 | 1.69        | 1.13–2.63 |          |
| Someone else                                  | Ref.     |           | Ref.        |           |          |
| <b>Covered by health insurance</b>            |          |           |             |           | 0.320    |
| No                                            | 0.12     | 0.04–0.33 | 0.54        | 0.16–0.82 |          |
| Yes                                           | Ref.     |           | Ref.        |           |          |

(Continued)

**Table 3.** (Continued)

| Variables                                                     | Crude OR | 95% CI    | Adjusted OR | 95% CI    | p-value* |
|---------------------------------------------------------------|----------|-----------|-------------|-----------|----------|
| <b>Mode of transport to the health facility</b>               |          |           |             |           | 0.038    |
| On foot                                                       | 0.78     | 0.48–1.27 | 1.01        | 1.00–1.67 |          |
| Vehicle                                                       | 0.68     | 0.39–1.85 | 0.25        | 0.10–0.58 |          |
| Boat/canoe                                                    | Ref.     |           | Ref.        |           |          |
| <b>Travel distance to the nearest health facility (hours)</b> |          |           |             |           | 0.021    |
| 0–5                                                           | Ref.     |           | Ref.        |           |          |
| 6–23                                                          | 2.65     | 1.87–3.74 | 0.72        | 0.49–0.93 |          |
| 24 or more                                                    | 4.74     | 2.38–9.46 | 1.02        | 1.39–2.70 |          |
| <b>Number of antenatal care visits</b>                        |          |           |             |           | < 0.001  |
| None                                                          | 0.61     | 0.41–0.80 | 1.08        | 1.04–1.51 |          |
| 1–3                                                           | 0.50     | 0.39–0.64 | 0.49        | 0.34–0.69 |          |
| 4 or more                                                     | Ref.     |           | Ref.        |           |          |
| <b>Number of children living</b>                              |          |           |             |           | 0.326    |
| 1                                                             | Ref.     |           | Ref.        |           |          |
| 2                                                             | 0.69     | 0.56–0.87 | 1.40        | 0.84–2.35 |          |
| 3 or more                                                     | 0.39     | 0.32–0.49 | 1.41        | 0.84–2.35 |          |

\*Statistical significance;  $p \leq 0.05$ .

Ref. = reference category; OR = odds ratio; CI = confidence intervals.

<https://doi.org/10.1371/journal.pone.0338606.t003>

(47.6%) [15] and Tanzania (21.4%) [7]. However, substantially higher rates of home or village births have been reported in several countries, including Chad (78%), Ethiopia (73%), and both Niger and Yemen (70%) [39]. Reported variations in the prevalence of home or village births across these studies may be attributed to differences in study populations, geographic contexts, and methodological approaches. The persistently high rate of non-facility births in PNG reflects systemic inequities in access to maternal healthcare services, especially skilled care during childbirth [18]. Consequently, this presents a significant challenge to maternal and child health, as it is closely associated with higher rates of maternal and infant mortality.

The findings indicate an inverse correlation between women's educational level and the non-utilization of health facilities for childbirth. Women with lower educational levels are significantly less likely to give birth in a health facility than their more educated counterparts, indicating that education may be a key determinant of health-seeking behavior during pregnancy and childbirth. This finding corroborates recent studies from India and PNG [18,40,41]. Women with higher levels of education tend to possess better knowledge of available services and have greater autonomy in seeking healthcare services [28,40]. Education plays a critical role in enhancing women's understanding of maternal health services and in fostering informed decision-making about their own health. Strategic investment in reproductive health education, both within school curricula and through adult literacy initiatives, can significantly improve the utilization of maternal health services [42,43].

A significant relationship was observed between the place of residence and non-utilization of health facilities for childbirth. Consistent with prior studies [18,31,41,44], the likelihood of rural women giving birth at home or in village settings remains higher than their urban counterparts. Many rural women face significant challenges related to cultural expectations, costs of transport, baby supplies, and accommodation when accessing health facilities. Incentives such as baby bundles (e.g., cotton nappies, blanket, sanitary supplies, and birthing fee), transport vouchers, or food allowance help reduce these burdens, making facility-based childbirth more feasible and appealing [45–47]. Incentive-based interventions may help shift entrenched cultural norms that favor home or village births by reinforcing the social legitimacy of

facility-based births. When women receive visible benefits, such as clean birth kits, baby bundles, or public recognition, these practices can become normalized within the community, gradually increasing their acceptability and uptake [45,47].

In this study, women from the Momase and Southern regions had lower odds of facility-based childbirth than those in the Islands region. In these regions, women rely on rural health facilities as their main source of care; yet these facilities frequently operate with limited resources and face chronic challenges stemming from inadequate infrastructure and ongoing logistical barriers [28]. These constraints impede the delivery of essential health services, restrict patient mobility, and contribute to delays in accessing skilled care, particularly during childbirth [18,28]. Another possible reason could be the lack of trained health workers or malfunctioning health facilities, which prevent women from using childbirth services [18,32]. This finding may also reflect the complex interplay of sociocultural norms around childbirth, financial barriers, and prior maternity care experiences that shape mothers' decisions to give birth at home or within their village [31,32]. Rural-urban gaps in maternal healthcare demand urgent investment in rural health systems to address geographic and infrastructure barriers limiting access for rural women.

Distance from health services was significantly associated with non-utilization of health facilities for childbirth in this study. Women residing farther from health facilities were less likely to use them for childbirth, consistent with previous findings from PNG [28,44]. Geographic challenges, including inadequate road infrastructure and prolonged travel times to health facilities, present substantial barriers for women to access maternal healthcare in the country [31,48,49]. These challenges, often involving navigation through difficult terrain, rivers, forests, and unsafe roads, may help explain why some women give birth at home or in their villages. Moreover, the high cost of transportation and the lack of local healthcare infrastructure also complicate access to health services, resulting in lower motivation among women to use them [28,48]. Improving access to health facilities requires better infrastructure, including enhanced connections to major roads, improved road surfaces, increased transport availability, and affordable transportation options in geographically underserved settings.

Consistent with previous studies [50,51], women without antenatal care visits were more likely to give birth at home or in the village than those who had antenatal visits. Poor uptake of antenatal care services among women may stem from several factors, such as sociodemographic status, the unavailability and inaccessibility of services, a shortage of health workers, and geographic remoteness [49,52]. Women may lack adequate information and education regarding the optimal benefits of antenatal care, which usually encompasses birth preparedness and readiness for complications during pregnancy [52,53]. Social norms and beliefs about pregnancy, labor, birth, and infant feeding practices can influence the uptake of maternal healthcare services [31,54], which could be another explanation for women's decision to forego antenatal care services to give birth in their homes or villages. As recommended by the WHO, at least eight antenatal care visits for pregnant women remain crucial for improving maternal and neonatal health outcomes and ensuring that women are informed about their health and prepared for childbirth [55]. Enhancing antenatal care uptake requires a comprehensive, multidimensional strategy that addresses geographic, socioeconomic, educational, and cultural determinants.

An inverse association was observed between autonomous decision-making and health facility utilization. Women who made their own healthcare decisions were more likely to give birth at home or in village settings. Such decisions may be influenced by factors such as poor health facility services, previous adverse or traumatic experiences, and a lack of supportive care from health workers [56–58]. These experiences reveal systemic gaps in respectful maternity care and a prevailing mistrust of formal health services. Another explanation could be that some women may opt for home or village births due to the presence of strong social and familial support, often lacking in health facilities. Women with strong familial support and greater autonomy in decision-making regarding childbirth were more likely to avoid health facilities [59].

Additionally, the study's findings highlight that husbands play a crucial role in shaping women's decisions regarding the non-utilization of health facilities for childbirth. Several studies have corroborated this finding [44,60,61]. Male involvement in decision-making regarding maternal health services is a critical yet often overlooked factor influencing maternal and neonatal outcomes in PNG [61]. Limited male involvement during pregnancy and childbirth is often driven by sociocultural

norms, role conflicts, and a lack of knowledge, resulting in poor decision-making and reduced emotional, financial, and logistical support for women [62,63]. This lack of involvement can delay care-seeking and increase the risks of adverse maternal and neonatal outcomes. However, when husbands and partners actively participate in maternal health services, women are more likely to access timely and appropriate care [62,64]. Strengthening their involvement requires tailored community-based efforts that promote both the benefits of participation and address barriers to informed decision-making. The study emphasizes the urgent need to increase the awareness of facility-based childbirth and enhance institutional support services to improve maternal health outcomes in PNG.

### Strengths and limitations of the study

This study demonstrates several methodological strengths. This population-based survey used a large, nationally representative sample and rigorously validated, standardized data collection protocols to ensure the reliability and generalizability of the findings. The substantial sample size contributed to a high response rate (84%), enhancing the reliability of the findings. Complex sample analysis was also conducted using sampling weights derived from the survey's multistage stratified design, ensuring accurate estimation of standard errors and confidence intervals. However, the study has some notable limitations. First, the study design was cross-sectional; hence, it is not possible to draw causal inferences from the findings. Second, the survey relied on women's self-reported health information, which significantly heightened the risk of recall bias. Third, the DHS data do not capture the sociocultural norms and customary practices that influence birth location decisions in rural PNG. Home or village birth often reflects entrenched community and cultural expectations [31,44], which quantitative analyses may overlook. Therefore, the findings should be interpreted with caution, acknowledging this contextual gap. Finally, the absence of qualitative data limits the understanding of critical social, cultural, and systemic factors, such as norms, beliefs, gender-based violence, and health system barriers that may influence women's decisions around facility-based childbirth. Future qualitative research is essential to elucidate these factors and guide the development of more contextually responsive policies and practices to increase women's use of health facilities for childbirth.

### Conclusions

More than half of the women in this study gave birth at home or in the village settings. The findings identified key demographic and service-related factors, such as maternal education, place of residence, region, decision-making autonomy, distance to health facilities, and frequency of antenatal care visits, as significant determinants of home or village births. Increasing uptake of facility-based childbirth requires coordinated health system efforts and incentive-based interventions to promote antenatal care and skilled birth services, particularly among rural women facing significant socioeconomic and geographic barriers. Furthermore, gender-inclusive strategies that actively engage husbands and partners in reproductive and maternal health decision-making are critical for improving women's access to and utilization of health facilities for supervised childbirth.

### Supporting information

**S1 File. STROBE checklist v2.**  
(DOCX)

### Acknowledgments

The authors gratefully acknowledge the MEASURE DHS project for granting access to the data used in this study. Appreciation is also extended to all individuals and institutions involved in conducting the DHS survey in PNG.

## Author contributions

**Conceptualization:** McKenzie Maviso, Gracelyn Potjepat.

**Data curation:** McKenzie Maviso.

**Formal analysis:** McKenzie Maviso.

**Methodology:** McKenzie Maviso, Rebecca Bogarobu Emori, Carolyn Ruth Hastie.

**Project administration:** McKenzie Maviso.

**Resources:** McKenzie Maviso.

**Software:** McKenzie Maviso, Rebecca Bogarobu Emori.

**Validation:** Gracelyn Potjepat, Rebecca Bogarobu Emori, Paula Zebedee Aines, Carolyn Ruth Hastie.

**Visualization:** Gracelyn Potjepat, Rebecca Bogarobu Emori, Paula Zebedee Aines.

**Writing – original draft:** McKenzie Maviso.

**Writing – review & editing:** McKenzie Maviso, Gracelyn Potjepat, Rebecca Bogarobu Emori, Paula Zebedee Aines, Carolyn Ruth Hastie.

## References

1. Lawrence ER, Klein TJ, Beyuo TK. Maternal mortality in low and middle-income countries. *Obstet Gynecol Clin North Am*. 2022;49(4):713–33. <https://doi.org/10.1016/j.ogc.2022.07.001> PMID: 36328676
2. World Health Organization. Trends in maternal mortality 2000 to 2020: estimates by WHO, UNICEF, UNFPA, World Bank Group and UNDESA/ Population Division. World Health Organization; 2023. <https://www.who.int/publications/i/item/9789240068759>
3. Souza JP, Day LT, Rezende-Gomes AC, Zhang J, Mori R, Baguiya A, et al. A global analysis of the determinants of maternal health and transitions in maternal mortality. *Lancet Glob Health*. 2024;12(2):e306–16. [https://doi.org/10.1016/S2214-109X\(23\)00468-0](https://doi.org/10.1016/S2214-109X(23)00468-0) PMID: 38070536
4. World Health Organization. Maternal mortality: Key facts. 2025. [Cited 2023]. <https://www.who.int/news-room/fact-sheets/detail/maternal-mortality>
5. Cresswell JA, Alexander M, Chong MYC, Link HM, Pejchinovska M, Gazeley U, et al. Global and regional causes of maternal deaths 2009–20: a WHO systematic analysis. *Lancet Glob Health*. 2025;13(4):e626–34. [https://doi.org/10.1016/S2214-109X\(24\)00560-6](https://doi.org/10.1016/S2214-109X(24)00560-6) PMID: 40064189
6. Buddeberg BS, Aveling W. Puerperal sepsis in the 21st century: progress, new challenges and the situation worldwide. *Postgrad Med J*. 2015;91(1080):572–8. <https://doi.org/10.1136/postgradmedj-2015-133475> PMID: 26310266
7. Priebe J, Amuasi J, Dartanto T, Mombo-Ngoma G, Guigas M. Factors associated with skilled birth attendance in 37 low-income and middle-income countries: a secondary analysis of nationally representative, individual-level data. *Lancet Glob Health*. 2024;12(7):e1104–10. [https://doi.org/10.1016/S2214-109X\(24\)00145-1](https://doi.org/10.1016/S2214-109X(24)00145-1) PMID: 38876758
8. Talon PY, Saizonou J, Kpozehouen A, Zannou RF, Ouendo E-M. Trends in the utilisation of skilled birth attendance among pregnant women in Benin, from 2001 to 2017–2018, and projections to 2030. *BMC Public Health*. 2023;23(1):874. <https://doi.org/10.1186/s12889-023-15460-x> PMID: 37173698
9. World Health Organization. Making pregnancy safer: the critical role of the skilled attendant: a joint statement by WHO, ICM and FIGO. World Health Organization; 2004.
10. World Health Organization. Definition of skilled health personnel providing care during childbirth: the 2018 joint statement by WHO. 2018. <https://www.who.int/reproductivehealth/publications/statement-competent-mnh-professionals/en/>
11. World Health Organization. World Health Statistics 2016: Monitoring Health for the Sustainable Development Goals (SDGs). World Health Organization. 2016.
12. Lindtjørn B, Mitiku D, Zidda Z, Yaya Y. Reducing maternal deaths in Ethiopia: results of an intervention programme in Southwest Ethiopia. *PLoS One*. 2017;12(1):e0169304. <https://doi.org/10.1371/journal.pone.0169304> PMID: 28046036
13. World Health Organization. Births attended by skilled health personnel. 2024. <https://data.who.int/indicators/i/F835E3B/1772666>
14. Yaya S, Bishwajit G, Uthman OA, Amouzou A. Why some women fail to give birth at health facilities: A comparative study between Ethiopia and Nigeria. *PLoS One*. 2018;13(5):e0196896. <https://doi.org/10.1371/journal.pone.0196896> PMID: 29723253
15. Ahinkorah BO. Non-utilization of health facility delivery and its correlates among childbearing women: a cross-sectional analysis of the 2018 Guinea demographic and health survey data. *BMC Health Serv Res*. 2020;20(1):1016. <https://doi.org/10.1186/s12913-020-05893-0> PMID: 33167985
16. Akokuwebe ME, Idemudia ES. Factors associated with choice of home birth as place of delivery among women of reproductive age in South Africa. *Afr J Reprod Health*. 2023;27(1):22–40. <https://doi.org/10.29063/ajrh2023/v27i1.3> PMID: 37584955



17. Aychiluhm SB, Melaku MS, Mare KU, Tadesse AW, Mulaw GF. Geographical clustering and geographically weighted regression analysis of home delivery and its determinants in developing regions of Ethiopia: a spatial analysis. *Emerg Themes Epidemiol*. 2022;19(1):8. <https://doi.org/10.1186/s12982-022-00117-8> PMID: 35986295
18. Seidu A-A, Ahinkorah BO, Agbaglo E, Oduro JK, Amoah A, Yaya S. Factors associated with the utilisation of skilled delivery services in Papua New Guinea: evidence from the 2016–2018 Demographic and Health Survey. *Int Health*. 2022;14(1):64–73. <https://doi.org/10.1093/inthealth/ihab007> PMID: 33684205
19. Byrne A, Hodge A, Jimenez-Soto E. Accelerating Maternal and Child Health Gains in Papua New Guinea: Modelled Predictions from Closing the Equity Gap Using LiST. *Matern Child Health J*. 2015;19(11):2429–37. <https://doi.org/10.1007/s10995-015-1762-6> PMID: 26108400
20. Au N, Hollingsworth B, Spinks J. Measuring the Efficiency of Health Services in Lower-Income Countries: The Case of Papua New Guinea. *Development Policy Review*. 2014;32(2):259–72.
21. World Health Organization. Trends in maternal mortality estimates 2000 to 2023: estimates by WHO, UNICEF, UNFPA, World Bank Group and UNDESA/Population Division. Geneva: UNFPA, World Bank Group and UNDESA/Population Division; 2025. <https://www.who.int/publications/item/9789240108462>
22. Mola G, Kirby B. Discrepancies between national maternal mortality data and international estimates: the experience of Papua New Guinea. *Reprod Health Matters*. 2013;21(42):191–202. [https://doi.org/10.1016/S0968-8080\(13\)42725-8](https://doi.org/10.1016/S0968-8080(13)42725-8) PMID: 24315074
23. Robbers G, Vogel JP, Mola G, Bolnga J, Homer CSE. Maternal and newborn health indicators in Papua New Guinea – 2008–2018. *Sexual and Reproductive Health Matters*. 2019;27(1):52–68.
24. Bolnga JW, Hamura NN, Umbers AJ, Rogerson SJ, Unger HW. Insights into maternal mortality in Madang Province, Papua New Guinea. *Int J Gynaecol Obstet*. 2014;124(2):123–7. <https://doi.org/10.1016/j.ijgo.2013.08.012> PMID: 24268715
25. Sanga K, De Costa C, Mola G. A review of maternal deaths at Goroka General Hospital, Papua New Guinea 2005–2008. *Australian and New Zealand Journal of Obstetrics and Gynaecology*. 2010;50(1):21–4.
26. Wilson AN, Spotswood N, Hayman GS, Vogel JP, Narasia J, Elijah A, et al. Improving the quality of maternal and newborn care in the Pacific region: A scoping review. *Lancet Reg Health West Pac*. 2020;3:100028. <https://doi.org/10.1016/j.lanwpc.2020.100028> PMID: 34327381
27. UNICEF. Health: We work to ensure the survival and health of children and women. 2025. <https://www.unicef.org/png/what-we-do/health>
28. Li Y, Li H, Jiang Y. Factors influencing maternal healthcare utilization in Papua New Guinea: Andersen's behaviour model. *BMC Womens Health*. 2023;23(1):544. <https://doi.org/10.1186/s12905-023-02709-1> PMID: 37865780
29. Valley LM, Homiehombo P, Kelly AM, Valley A, Homer CSE, Whittaker A. Exploring women's perspectives of access to care during pregnancy and childbirth: a qualitative study from rural Papua New Guinea. *Midwifery*. 2013;29(10):1222–9. <https://doi.org/10.1016/j.midw.2013.03.011> PMID: 23684099
30. Emori R, Valley A, Gouda H, Siba P, Phuanukoonnon S, Mola G, et al. Supervised and unsupervised birth and early newborn care practices in Papua New Guinea: findings of a maternal and infant health survey conducted in three provinces. *Papua New Guinea Medical Journal*. 2017;60(1/2):27–40.
31. Valley LM, Homiehombo P, Kelly-Hanku A, Valley A, Homer CSE, Whittaker A. Childbirth in a rural highlands community in Papua New Guinea: a descriptive study. *Midwifery*. 2015;31(3):380–7. <https://doi.org/10.1016/j.midw.2014.11.002> PMID: 25467594
32. Ipi N, Vince J, Mola G. Sociocultural barriers to access and utilization of birth delivery services in a rural area of Papua New Guinea. *Papua New Guinea Medical Journal*. 2016;59(3/4).
33. National Statistical Office (NSO) PNG, ICF. Papua New Guinea Demographic and Health Survey 2016–18. Port Moresby, Papua New Guinea, and Rockville, Maryland, USA: NSO and ICF. 2019. <https://www.dhsprogram.com/pubs/pdf/FR364/FR364.pdf>
34. NSO. National Population & Housing Census 2011. NSO. 2011. <https://www.nso.gov.pg/statistics/population/>
35. Ayalew HG, Assefa KT, Desalegn SY, Mesele TT, Anteneh TA, Tibebe NS, et al. Individual and community-level determinants of skilled birth attendant delivery in Ethiopia: multilevel analysis. *PLoS One*. 2023;18(8):e0289145. <https://doi.org/10.1371/journal.pone.0289145> PMID: 37527239
36. Islam MA, Nahar MT, Siddiquee T, Toma AS, Hoque F, Hossain MZ. Prevalence and determinants of utilizing skilled birth attendance during home delivery of pregnant women in India: Evidence from the Indian Demographic and Health Survey 2015–16. *PLOS ONE*. 2024;19(3):e0295389. <https://doi.org/10.1371/journal.pone.0295389>
37. Craney TA, Surles JG. Model-Dependent Variance Inflation Factor Cutoff Values. *Quality Engineering*. 2002;14(3):391–403. <https://doi.org/10.1081/gen-120001878>
38. von Elm E, Altman DG, Egger M, Pocock SJ, Gøtzsche PC, Vandenbroucke JP, et al. The Strengthening of Reporting of Observational Studies in Epidemiology (STROBE) statement: guidelines for reporting observational studies. *Lancet*. 2007;370(9596):1453–7. [https://doi.org/10.1016/S0140-6736\(07\)61602-X](https://doi.org/10.1016/S0140-6736(07)61602-X) PMID: 18064739
39. Hernández-Vásquez A, Chacón-Torrico H, Bendezu-Quispe G. Prevalence of home birth among 880,345 women in 67 low- and middle-income countries: A meta-analysis of Demographic and Health Surveys. *SSM - Population Health*. 2021;16:100955.
40. Pradhan MR, De P. Women's healthcare access: assessing the household, logistic and facility-level barriers in India. *BMC Health Serv Res*. 2025;25(1):323. <https://doi.org/10.1186/s12913-025-12463-9> PMID: 40016775
41. Seidu A-A, Agbaglo E, Dadzie LK, Ahinkorah BO, Ameyaw EK, Tetteh JK. Individual and contextual factors associated with barriers to accessing healthcare among women in Papua New Guinea: insights from a nationwide demographic and health survey. *Int Health*. 2021;13(6):573–85. <https://doi.org/10.1093/inthealth/ihaa097> PMID: 33278299



42. Khan M, Dave A, Benton M, Moss N, Kaler MK. Health literacy interventions for pregnant women with limited language proficiency in the country they live in: a systematic review. *BMC Public Health*. 2024;24(1):3287. <https://doi.org/10.1186/s12889-024-20747-8> PMID: [39592991](#)
43. Kumar R, Anwar M, Naeem N, Asim M, Kumari R, Pongpanich S. Effect of health education on knowledge, perception, and intended contraceptive use for family planning among university students in Pakistan. *Sci Rep*. 2024;14(1):28474. <https://doi.org/10.1038/s41598-024-79550-5> PMID: [39557964](#)
44. Aines PZ, Graham K, Sweet L. Factors influencing women's and men's place of birth decisions in rural Western Highlands Province of Papua New Guinea: A qualitative descriptive study. *Women Birth*. 2025;38(1):101862. <https://doi.org/10.1016/j.wombi.2024.101862> PMID: [39778372](#)
45. Kirby B, Mola G, Case C, Robson SJ. The use of "mother and baby gifts" (MBGs) to increase uptake of supervised births in the Milne Bay Province of Papua New Guinea. *Aust N Z J Obstet Gynaecol*. 2015;55(3):291–3. <https://doi.org/10.1111/ajo.12325> PMID: [26053160](#)
46. Ommeh M, Fenenga CJ, Hesp CJ, Nzorubara D, de Wit TFR. Using mobile transport vouchers to improve access to skilled delivery. *Rural and Remote Health*. 2019;19(1):1–6.
47. Ir P, Horemans D, Souk N, Van Damme W. Using targeted vouchers and health equity funds to improve access to skilled birth attendants for poor women: a case study in three rural health districts in Cambodia. *BMC Pregnancy Childbirth*. 2010;10:1. <https://doi.org/10.1186/1471-2393-10-1> PMID: [20059767](#)
48. Kassens AL, van der Meulen Rodgers Y. Health and Distance to Healthcare in Papua New Guinea. *New Frontiers in Regional Science: Asian Perspectives*. Springer Singapore; 2019. p. 203–29. [https://doi.org/10.1007/978-981-13-6268-2\\_10](https://doi.org/10.1007/978-981-13-6268-2_10)
49. Mahal A, Mulou N, Ishida M. Distance to healthcare facilities, healthcare use and health outcomes: The case of Papua New Guinea. *Australian Economic Papers*. 2023;62(4):616–32.
50. Rodrigo-Gallardo PK, Caira-Chuquineyra B, Fernandez-Guzman D, Urrunaga-Pastor D, Alejandro-Salinas R, Vasquez-Chavesta AZ, et al. Determinants of non-institutional childbirth: Evidence from the Peruvian demographic and health survey. *Eur J Obstet Gynecol Reprod Biol X*. 2023;20:100250. <https://doi.org/10.1016/j.eurox.2023.100250> PMID: [37942028](#)
51. Geta T, Sugebo F, Anjulo F. Practice of non-institutional delivery and its associated factors among women who gave birth in Southern Ethiopia. *BMC Women's Health*. 2023;23(1):529. <https://doi.org/10.1186/s12905-023-02345-5>
52. Seidu AA. Factors associated with early antenatal care attendance among women in Papua New Guinea: a population-based cross-sectional study. *Archives of Public Health*. 2021;79(1):70.
53. Eghrari D, Scoullar MJL, Wilson AN, Peach E, Elijah A, Melepie P, et al. Low knowledge of newborn danger signs among pregnant women in Papua New Guinea and implications for health seeking behaviour in early infancy - findings from a longitudinal study. *BMC Pregnancy Childbirth*. 2023;23(1):71. <https://doi.org/10.1186/s12884-022-05322-6> PMID: [36703135](#)
54. Maviso MK, Kaforau LM, Hastie C. Influence of grandmothers on breastfeeding practices in a rural community in Papua New Guinea: A critical discourse analysis of first-time mothers' perspectives. *Women Birth*. 2023;36(2):e263–9. <https://doi.org/10.1016/j.wombi.2022.08.001> PMID: [35963836](#)
55. World Health Organization. WHO recommendations on antenatal care for a positive pregnancy experience. 2016. <https://www.who.int/publications/i/item/9789241549912>
56. Rodríguez-Almagro J, Hernández-Martínez A, Rodríguez-Almagro D, Quirós-García JM, Martínez-Galiano JM, Gómez-Salgado J. Women's perceptions of living a traumatic childbirth experience and factors related to a birth experience. *Int J Environ Res Public Health*. 2019;16(9):1654. <https://doi.org/10.3390/ijerph16091654> PMID: [31085980](#)
57. Kasaye H, Scarf V, Sheehy A, Baird K. Health care providers' perspectives on the mistreatment towards women during maternity care: Do perceptions of the working environment and empathy level matter?. *Women and Birth*. 2024;37(3):101601.
58. Shiferaw BB, Modiba LM. Why do women not use skilled birth attendance service? An explorative qualitative study in north West Ethiopia. *BMC Pregnancy Childbirth*. 2020;20(1):633. <https://doi.org/10.1186/s12884-020-03312-0> PMID: [33076867](#)
59. Al-Mutawtah M, Campbell E, Kubis H-P, Erjavec M. Women's experiences of social support during pregnancy: a qualitative systematic review. *BMC Pregnancy Childbirth*. 2023;23(1):782. <https://doi.org/10.1186/s12884-023-06089-0> PMID: [37950165](#)
60. McKenzie M. Experiences of men's involvement in antenatal education services in the rural Eastern Highlands Province of Papua New Guinea: a descriptive qualitative study. *Pac J Reprod Health*. 2018;1(7):346. <https://doi.org/10.18313/pjrh.2018.901>
61. Davis J, Vaughan C, Nankina J, Davidson L, Kigodi H, Alalo E, et al. Expectant fathers' participation in antenatal care services in Papua New Guinea: a qualitative inquiry. *BMC Pregnancy Childbirth*. 2018;18(1):138. <https://doi.org/10.1186/s12884-018-1759-4> PMID: [29739351](#)
62. Moyo E, Dzinamarira T, Moyo P, Murewanhema G, Ross A. Men's involvement in maternal health in sub-Saharan Africa: A scoping review of enablers and barriers. *Midwifery*. 2024;133:103993. <https://doi.org/10.1016/j.midw.2024.103993> PMID: [38626505](#)
63. Muhabaw T, Hailemeskel S, Lambebo A. Male involvement in antenatal care and associated factors among married men with wives who recently gave birth in Debre Tabor town, North West Ethiopia. *BMC Pregnancy Childbirth*. 2024;24(1):642. <https://doi.org/10.1186/s12884-024-06809-0> PMID: [39363276](#)
64. Degefa N, Dure A, Getahun D, Bukala Z, Bekelcho T. Male partners involvement in their wives' antenatal care and its associated factors in southern Ethiopia: A community-based cross-sectional study. *Heliyon*. 2024;10(7).
